# Supplementary material for: Construction of a high-nuclearity Nd(iii) nanoring for the NIR luminescent detection of antibiotics
Source: Royal Society of Chemistry journal article supplement (doi:10.1039/d1dt00230a), 2021-01-01
Supplement: d1dt00230a1.pdf [file d1dt00230a1.pdf]

## Supporting Information

# **Construction of a high-nuclearity Nd(III) nanoring for the NIR Luminescent detection of antibiotics**

**Wenxin Hao, Xiaoping Yang, Yanan Ma, Mengyu Niu, Dongliang Shi, and Desmond Schipper**

## **Contents**

|                                                                                             |     |
|---------------------------------------------------------------------------------------------|-----|
| 1. IR spectra of the free ligand H <sub>2</sub> L and <b>1</b> .....                        | S2  |
| 2. The thermogravimetric analysis of <b>1</b> .....                                         | S2  |
| 3. Powder XRD pattern of <b>1</b> .....                                                     | S3  |
| 4. UV-vis absorption spectra of the free ligand H <sub>2</sub> L and <b>1</b> .....         | S3  |
| 5. The NIR emission lifetime of <b>1</b> .....                                              | S4  |
| 6. Chemical structures of antibiotics.....                                                  | S5  |
| 7. The NIR luminescent sensing of <b>1</b> to antibiotics.....                              | S6  |
| 8. The NIR luminescent quenching of <b>1</b> caused by antibiotics.....                     | S9  |
| 9. The visible emission quenching of free H <sub>2</sub> L ligand to antibiotics.....       | S9  |
| 10. The luminescent response of <b>1</b> to antibiotic drugs sold in pharmacy.....          | S10 |
| 11. The luminescent response of recycled <b>1</b> to antibiotic drugs sold in pharmacy..... | S11 |
| 12. X-Ray Crystallography.....                                                              | S12 |

## 1. IR spectra of the free ligand H<sub>2</sub>L and 1

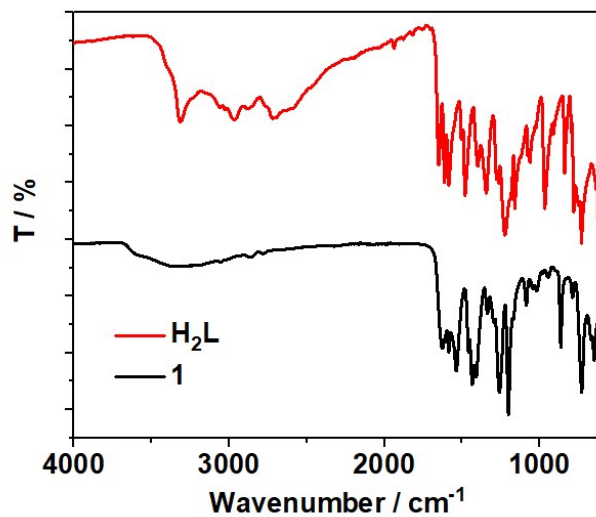

Figure S1. IR spectra of free ligand H<sub>2</sub>L and 1.

## 2. The thermogravimetric analysis of 1

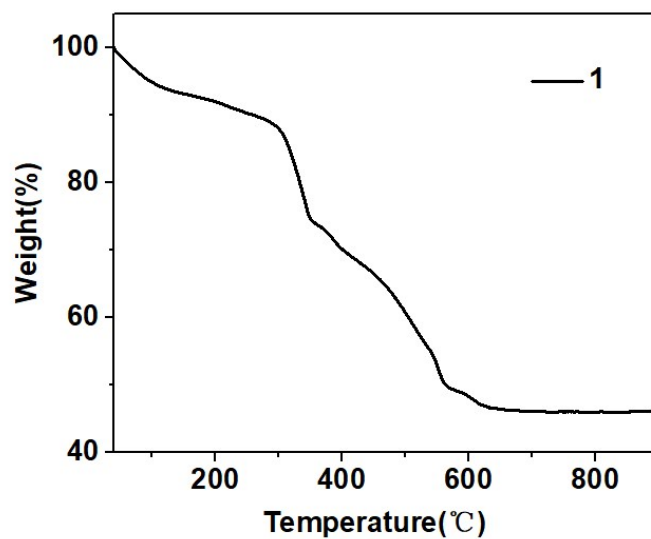

Figure S2. The thermogravimetric analysis of 1.

### 3. Powder XRD patterns of **1**

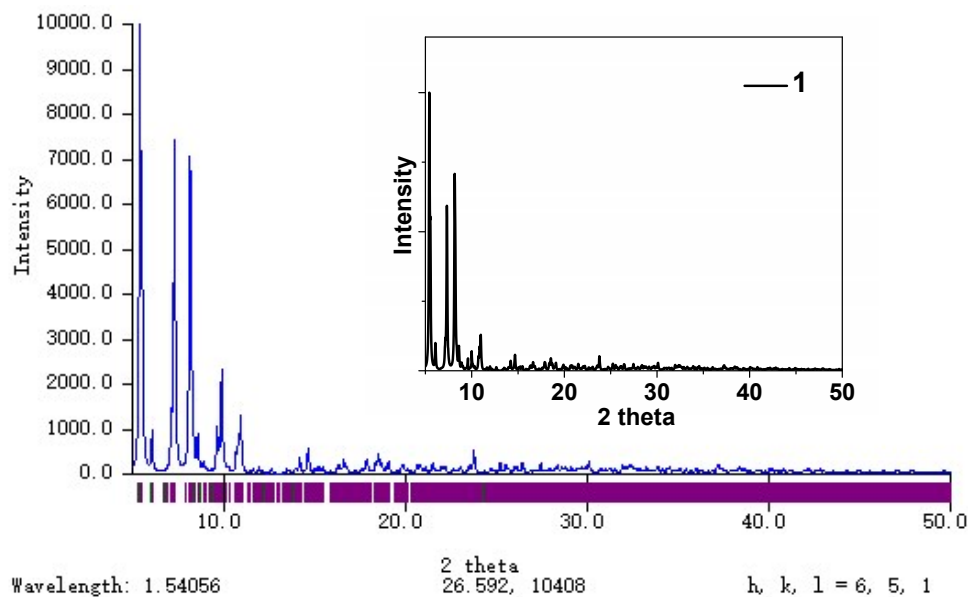

Figure S3. Powder XRD pattern of **1**.

### 4. UV-vis absorption spectra of the free ligand $H_2L$ and **1**

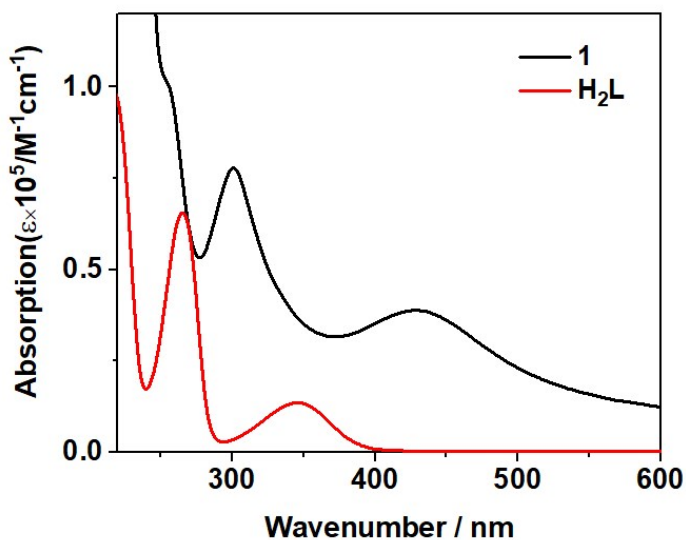

Figure S4. UV-vis absorption spectra of the free ligand  $H_2L$  and **1** in  $CH_3CN$  ( $c = 5 \mu M$ ).

## 5. The NIR emission lifetime of 1

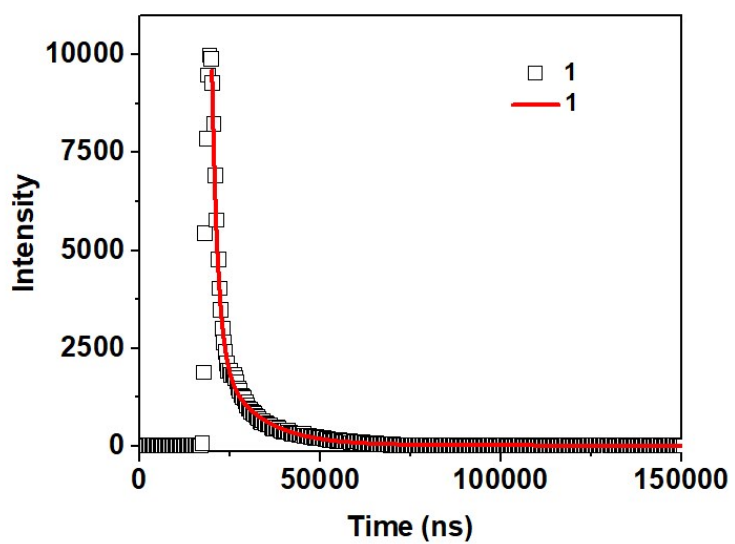

**Figure S5.** The NIR emission lifetime of **1** in CH<sub>3</sub>CN (10 μM).

## 6. Chemical structures of antibiotics

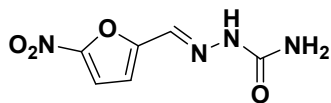

Nitrofurazone (NFZ)

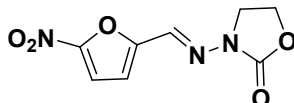

Furazolidone (FZD)

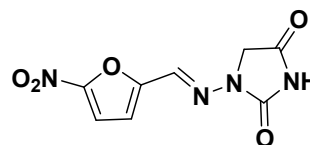

Nitrofurantion (NFT)

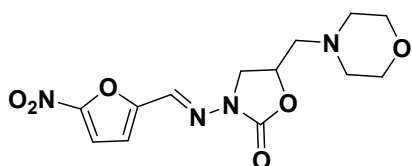

Furaltadone (FTD)

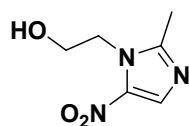

Metronidazole (MDZ)

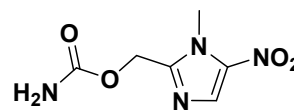

Ronidazole (RDZ)

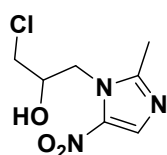

Omidazole (ODZ)

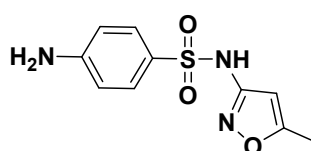

Sulfamethoxazole (SMX)

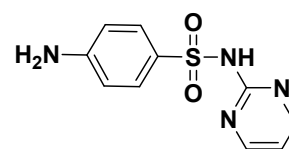

Sulfadiazine (SDZ)

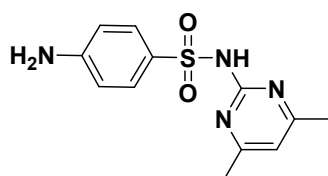

Sulfamethazine (SMZ)

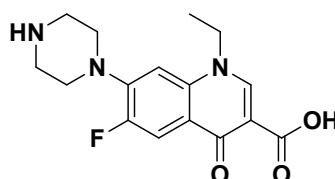

Norfloxacin (NFX)

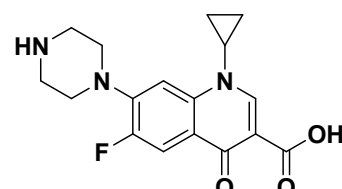

Ciprofloxacin (CPFX)

Figure S6. Chemical structures of antibiotics.

## 7. NIR luminescent sensing of 1 to antibiotics

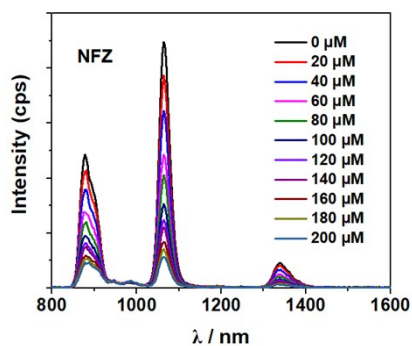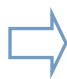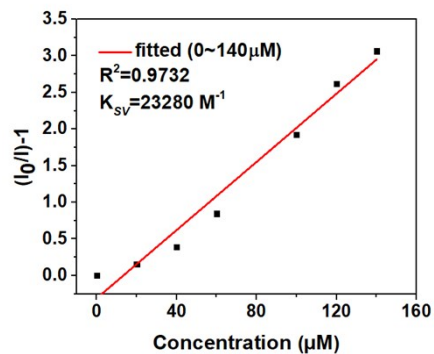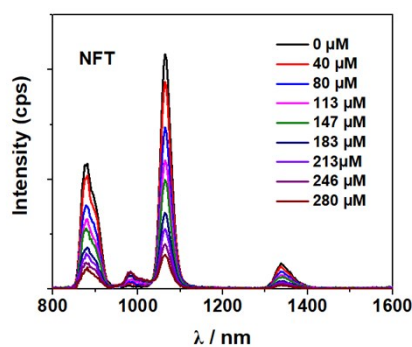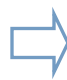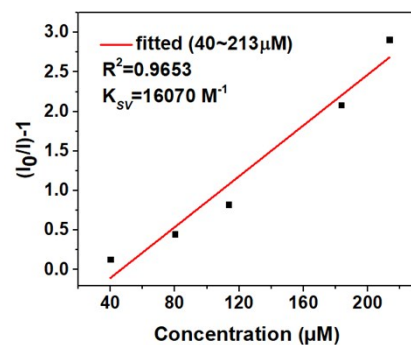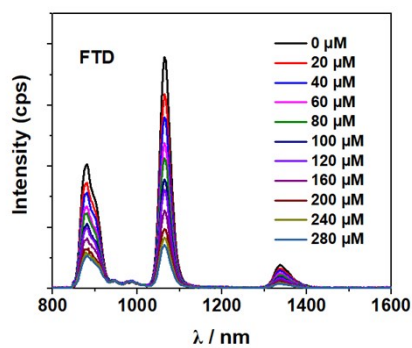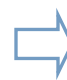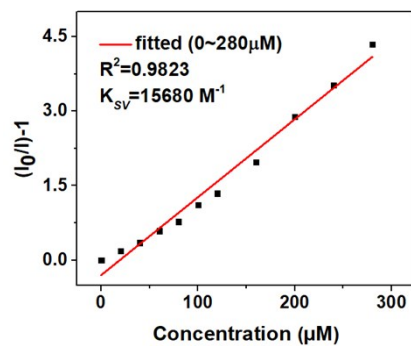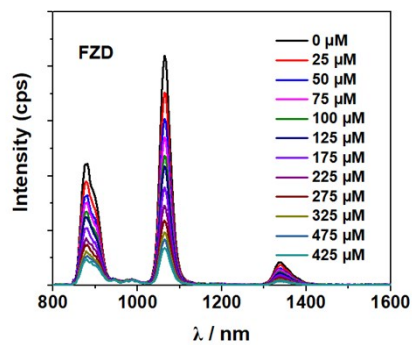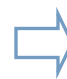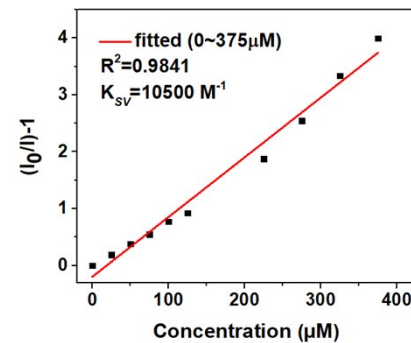

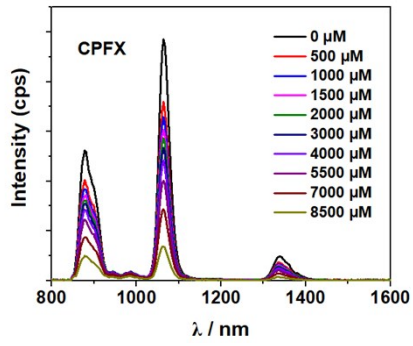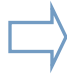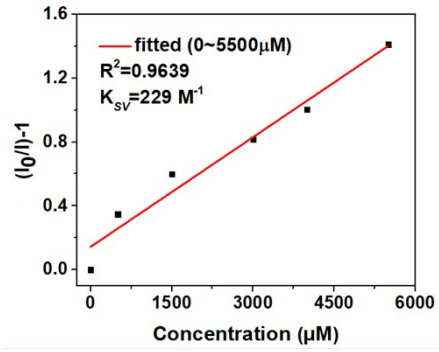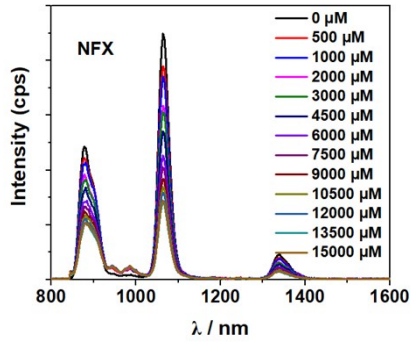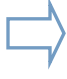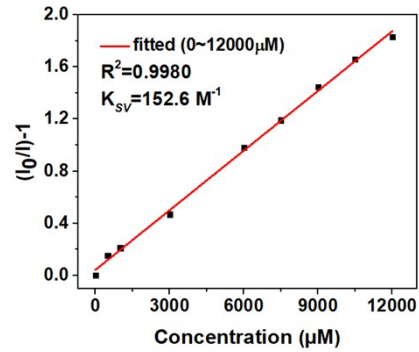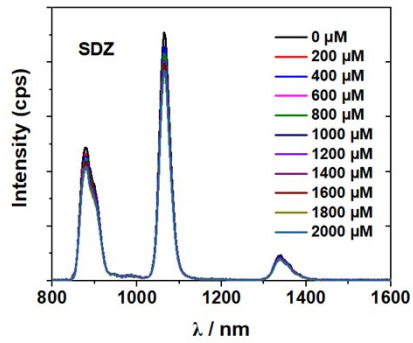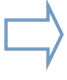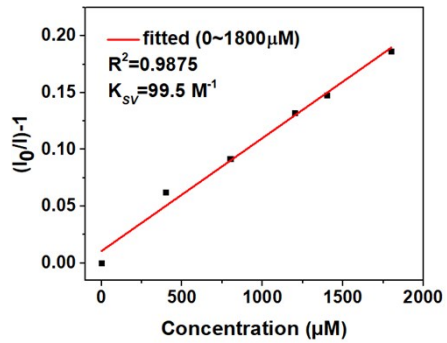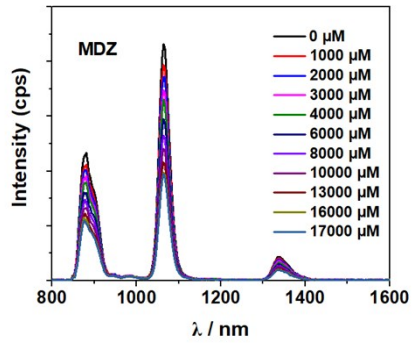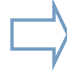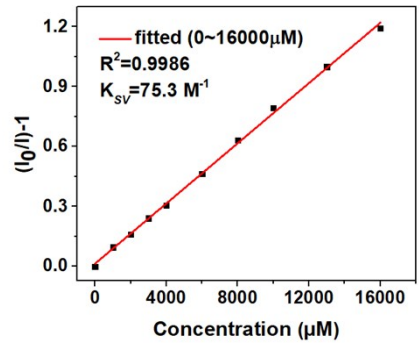

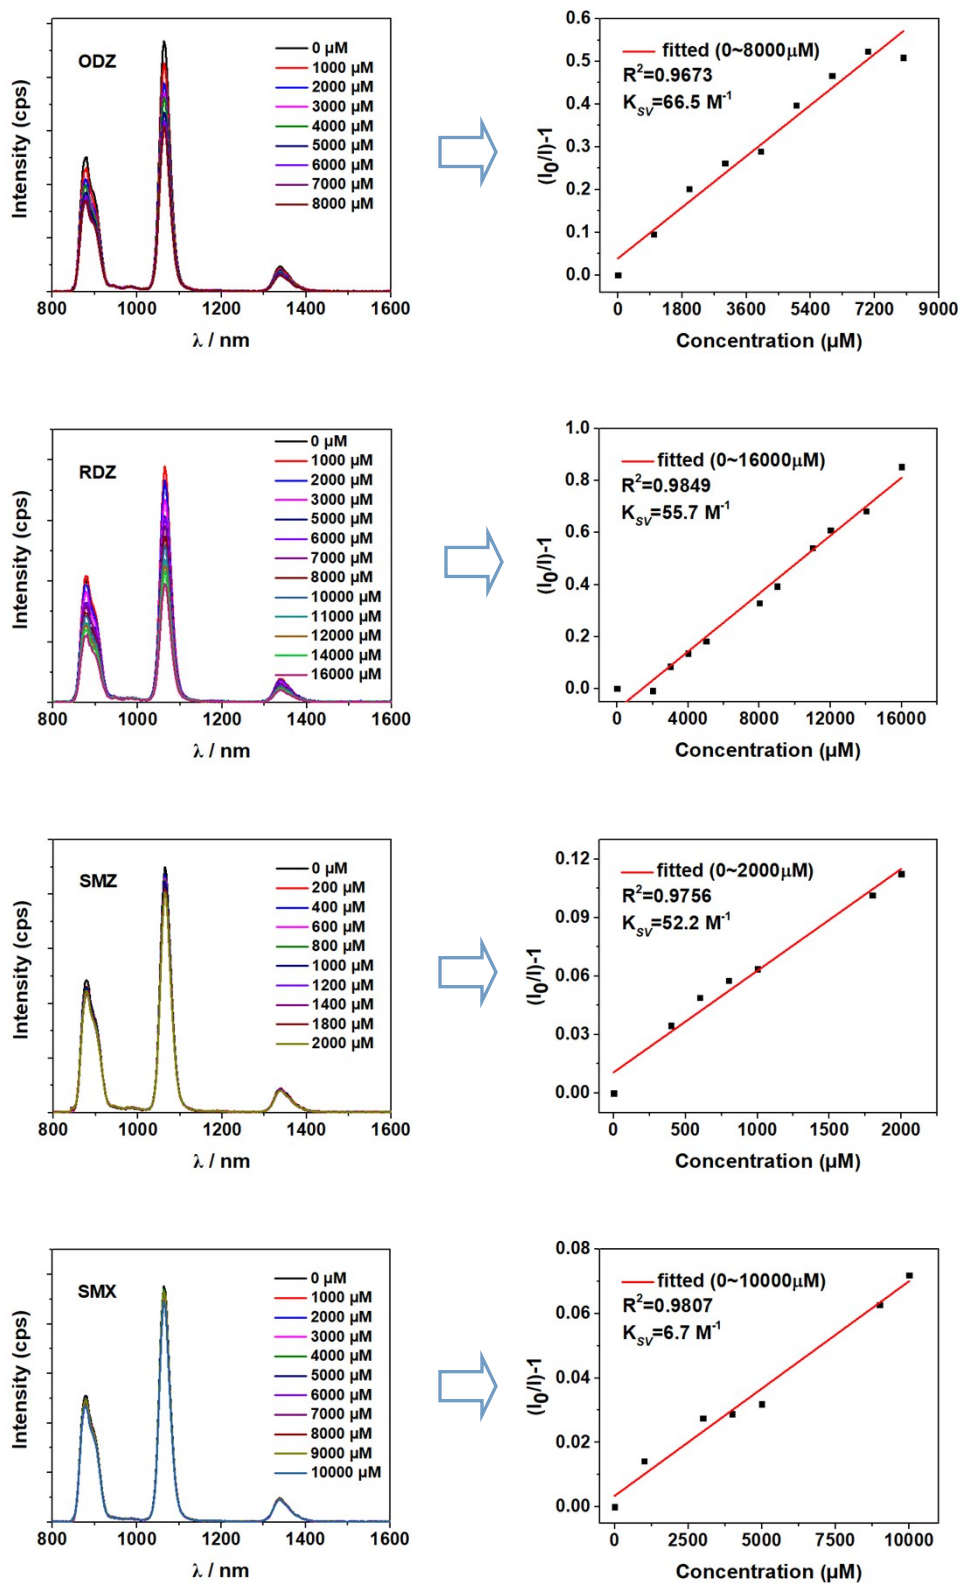

**Figure S7.** NIR luminescent sensing of **1** (10  $\mu\text{M}$ ) to antibiotics in  $\text{CH}_3\text{CN}$  ( $\lambda_{\text{ex}} = 404 \text{ nm}$ ).



## 8. The NIR luminescent quenching of 1 caused by antibiotics

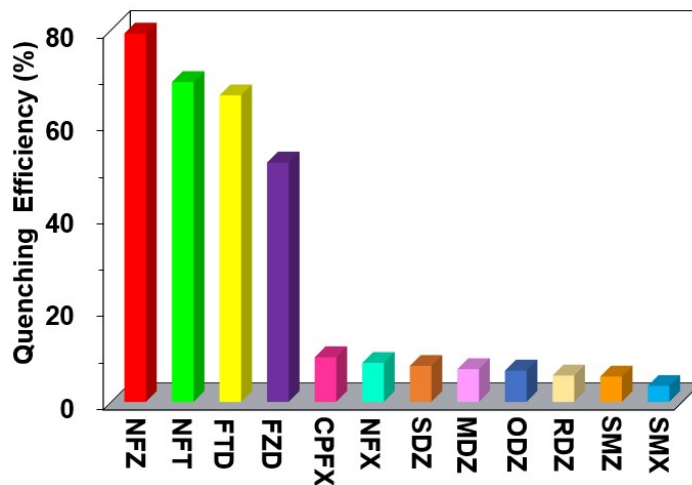

Figure S8. Percentages of NIR emission quenching of 1 (10  $\mu$ M) caused by antibiotics (190  $\mu$ M).

## 9. The visible emission quenching of free H<sub>2</sub>L ligand to antibiotics

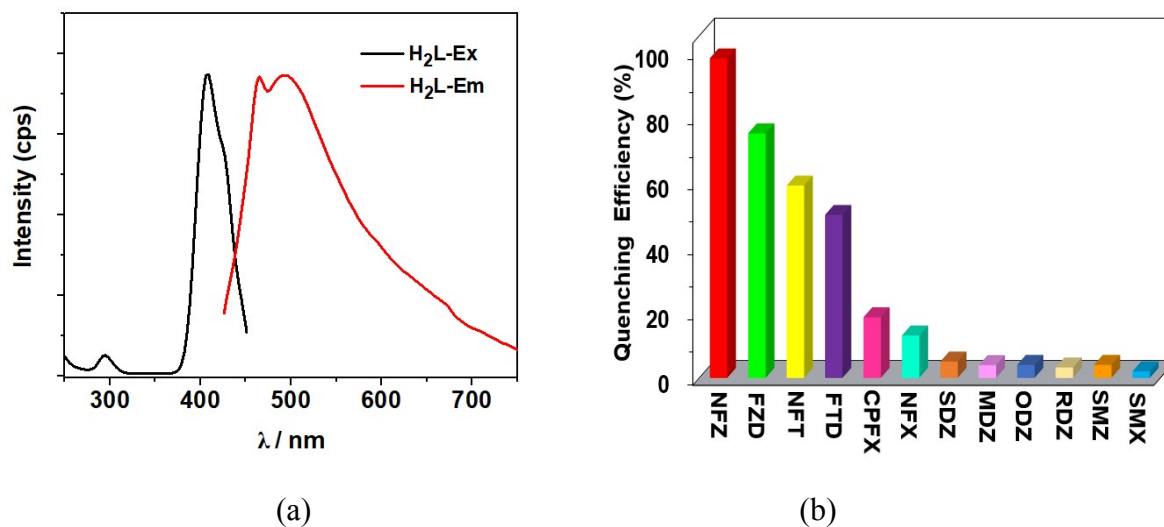

Figure S9. (a) The excitation ( $\lambda_{em}$  = 492 nm) and emission ( $\lambda_{ex}$  = 409 nm) spectra of the free H<sub>2</sub>L ligand; (b) Percentages of visible emission quenching of the free H<sub>2</sub>L ligand (10  $\mu$ M) caused by antibiotics (190  $\mu$ M). ( $\lambda_{ex}$  = 409 nm)

## 10. The luminescent response of **1** to antibiotic drugs sold in pharmacy

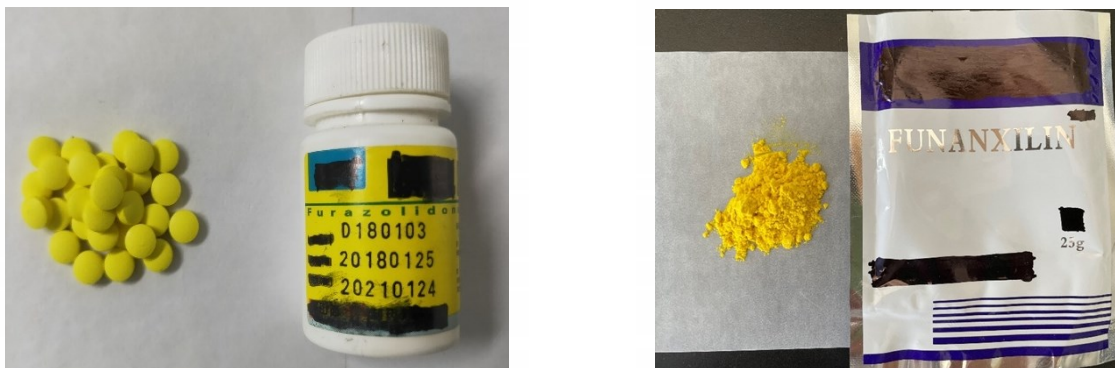

(a)

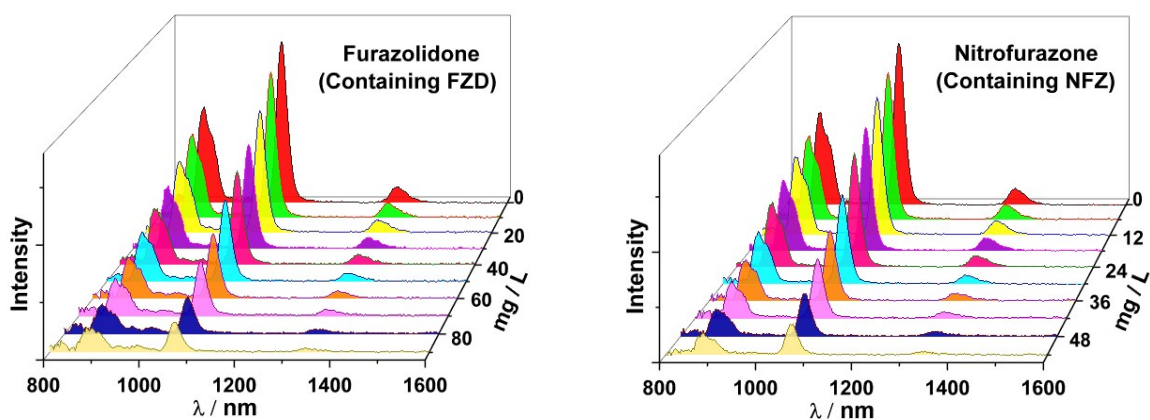

(b)

**Figure S10.** (a) The photos of antibiotic drugs furazolidone (containing FZD) and nitrofurazone (containing NFZ) sold in pharmacy; (b) The luminescent response of **1** ( $10 \mu\text{M}$ ) to furazolidone and nitrofurazone in  $\text{CH}_3\text{CN}$ . ( $\lambda_{\text{ex}} = 404 \text{ nm}$ )

## 11. The luminescent response of recycled 1 to antibiotic drugs sold in pharmacy

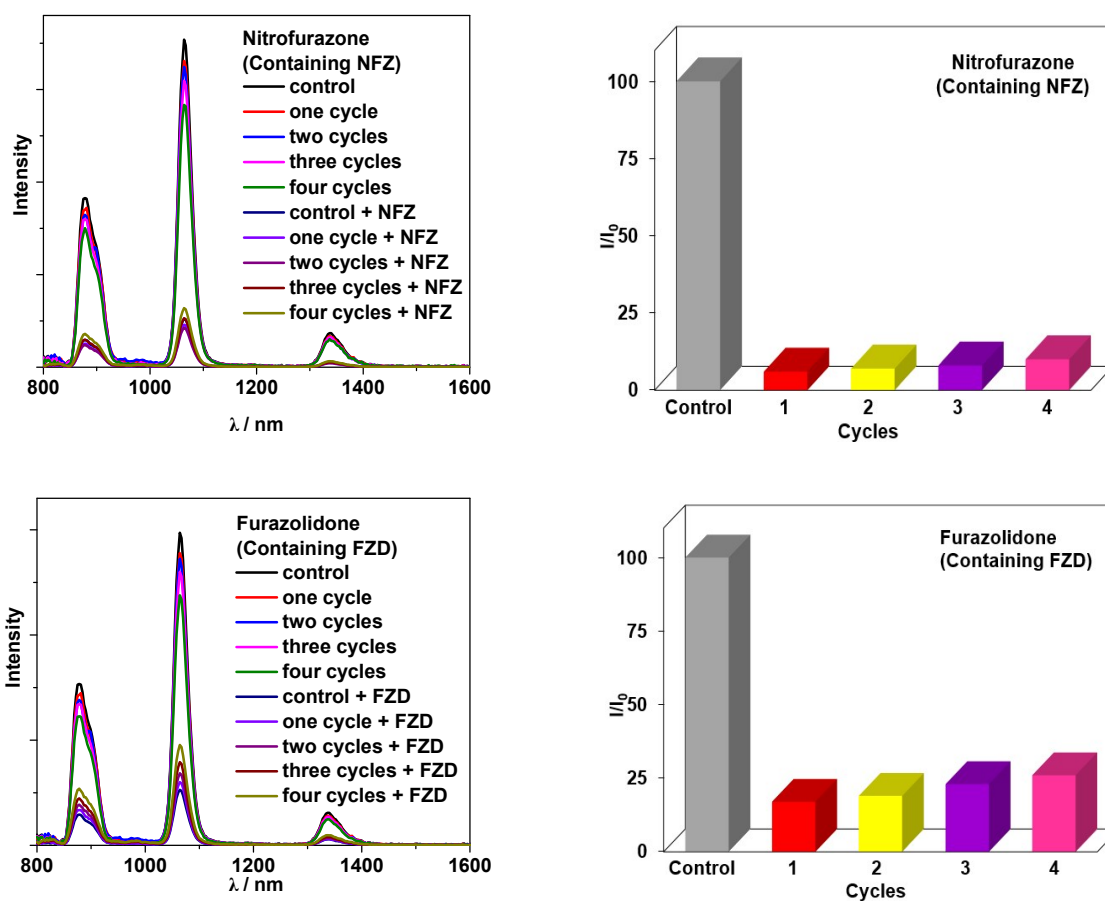

**Figure S11.** The luminescence quenching of **1** ( $10 \mu\text{M}$ ) after 1-4 times recycled with the addition of 80 mg/L of nitrofurazone and furazolidone sold in pharmacy in  $\text{CH}_3\text{CN}$ . ( $\lambda_{\text{ex}} = 404 \text{ nm}$ )

## 12. X-Ray Crystallography

**Table S1.** Selected bond lengths (Å) and angles (°) for **1**.

---

|             |           |              |           |
|-------------|-----------|--------------|-----------|
| Nd(1)-O(6)  | 2.354(15) | Nd(6)-O(19)  | 2.518(16) |
| Nd(1)-O(53) | 2.374(17) | Nd(6)-O(18)  | 2.546(14) |
| Nd(1)-O(2)  | 2.385(16) | Nd(7)-O(79)  | 2.346(17) |
| Nd(1)-O(74) | 2.39(3)   | Nd(7)-O(18)  | 2.352(13) |
| Nd(1)-O(56) | 2.422(16) | Nd(7)-O(23)  | 2.392(16) |
| Nd(1)-O(57) | 2.429(17) | Nd(7)-O(27)  | 2.424(15) |
| Nd(1)-O(1)  | 2.48(2)   | Nd(7)-O(26)  | 2.436(16) |
| Nd(1)-O(52) | 2.493(19) | Nd(7)-O(22)  | 2.502(19) |
| Nd(2)-O(8)  | 2.364(16) | Nd(7)-O(78)  | 2.53(2)   |
| Nd(2)-O(2)  | 2.405(17) | Nd(7)-O(76)  | 2.53(3)   |
| Nd(2)-O(57) | 2.417(17) | Nd(8)-O(36)  | 2.347(14) |
| Nd(2)-O(3)  | 2.446(16) | Nd(8)-O(29)  | 2.351(17) |
| Nd(2)-O(5)  | 2.466(14) | Nd(8)-O(26)  | 2.373(14) |
| Nd(2)-O(58) | 2.502(16) | Nd(8)-O(23)  | 2.418(17) |
| Nd(2)-O(6)  | 2.508(14) | Nd(8)-O(24)  | 2.422(16) |
| Nd(2)-O(64) | 2.56(2)   | Nd(8)-O(25)  | 2.50(2)   |
| Nd(2)-O(7)  | 2.568(18) | Nd(8)-O(28)  | 2.502(19) |
| Nd(3)-O(3)  | 2.406(16) | Nd(8)-O(77)  | 2.55(4)   |
| Nd(3)-O(11) | 2.407(17) | Nd(8)-O(76)  | 2.66(3)   |
| Nd(3)-O(5)  | 2.418(14) | Nd(9)-O(32)  | 2.333(16) |
| Nd(3)-O(9)  | 2.420(15) | Nd(9)-O(29)  | 2.415(16) |
| Nd(3)-O(8)  | 2.446(15) | Nd(9)-O(24)  | 2.436(17) |
| Nd(3)-O(10) | 2.520(18) | Nd(9)-O(35)  | 2.436(15) |
| Nd(3)-O(65) | 2.54(2)   | Nd(9)-O(61)  | 2.443(16) |
| Nd(3)-O(66) | 2.60(2)   | Nd(9)-O(30)  | 2.489(17) |
| Nd(3)-O(4)  | 2.620(15) | Nd(9)-O(69)  | 2.50(2)   |
| Nd(4)-O(15) | 2.313(18) | Nd(9)-O(36)  | 2.514(14) |
| Nd(4)-O(12) | 2.321(18) | Nd(9)-O(31)  | 2.526(16) |
| Nd(4)-O(9)  | 2.337(15) | Nd(10)-O(30) | 2.408(17) |
| Nd(4)-O(21) | 2.371(14) | Nd(10)-O(63) | 2.42(2)   |
| Nd(4)-O(11) | 2.413(16) | Nd(10)-O(33) | 2.426(15) |
| Nd(4)-O(14) | 2.435(17) | Nd(10)-O(35) | 2.430(15) |
| Nd(4)-O(4)  | 2.585(16) | Nd(10)-O(38) | 2.431(18) |
| Nd(4)-O(16) | 2.606(16) | Nd(10)-O(32) | 2.470(16) |
| Nd(5)-O(14) | 2.388(16) | Nd(10)-O(70) | 2.48(2)   |
| Nd(5)-O(80) | 2.389(16) | Nd(10)-O(37) | 2.51(2)   |
| Nd(5)-O(17) | 2.422(15) | Nd(10)-O(34) | 2.610(15) |
| Nd(5)-O(59) | 2.434(18) | Nd(11)-O(42) | 2.299(19) |
| Nd(5)-O(21) | 2.438(14) | Nd(11)-O(39) | 2.312(19) |
| Nd(5)-O(20) | 2.445(14) | Nd(11)-O(48) | 2.342(15) |
| Nd(5)-O(67) | 2.50(2)   | Nd(11)-O(33) | 2.378(15) |
| Nd(5)-O(13) | 2.50(2)   | Nd(11)-O(38) | 2.406(16) |
| Nd(5)-O(16) | 2.629(17) | Nd(11)-O(41) | 2.433(16) |
| Nd(6)-O(20) | 2.358(14) | Nd(11)-O(43) | 2.571(15) |
| Nd(6)-O(79) | 2.429(16) | Nd(11)-O(34) | 2.616(15) |
| Nd(6)-O(27) | 2.441(15) | Nd(12)-O(41) | 2.395(16) |
| Nd(6)-O(17) | 2.445(14) | Nd(12)-O(48) | 2.402(15) |
| Nd(6)-O(80) | 2.478(16) | Nd(12)-O(51) | 2.405(18) |
| Nd(6)-O(60) | 2.482(15) | Nd(12)-O(47) | 2.409(15) |
| Nd(6)-O(68) | 2.49(2)   | Nd(12)-O(44) | 2.432(15) |

|                   |           |                   |          |
|-------------------|-----------|-------------------|----------|
| Nd(12)-O(40)      | 2.510(18) | O(57)-Nd(2)-O(3)  | 133.0(6) |
| Nd(12)-O(71)      | 2.571(19) | O(8)-Nd(2)-O(5)   | 67.5(5)  |
| Nd(12)-O(72)      | 2.58(2)   | O(2)-Nd(2)-O(5)   | 95.3(5)  |
| Nd(12)-O(43)      | 2.604(16) | O(57)-Nd(2)-O(5)  | 132.2(5) |
| Nd(13)-O(47)      | 2.368(14) | O(3)-Nd(2)-O(5)   | 67.6(5)  |
| Nd(13)-O(54)      | 2.403(16) | O(8)-Nd(2)-O(58)  | 81.6(5)  |
| Nd(13)-O(50)      | 2.405(17) | O(2)-Nd(2)-O(58)  | 137.9(5) |
| Nd(13)-O(51)      | 2.458(17) | O(57)-Nd(2)-O(58) | 82.6(5)  |
| Nd(13)-O(44)      | 2.459(15) | O(3)-Nd(2)-O(58)  | 142.9(5) |
| Nd(13)-O(62)      | 2.509(16) | O(5)-Nd(2)-O(58)  | 80.5(5)  |
| Nd(13)-O(45)      | 2.551(14) | O(8)-Nd(2)-O(6)   | 128.0(5) |
| Nd(13)-O(46)      | 2.562(18) | O(2)-Nd(2)-O(6)   | 69.0(5)  |
| Nd(13)-O(73)      | 2.58(2)   | O(57)-Nd(2)-O(6)  | 67.6(5)  |
| Nd(14)-O(50)      | 2.347(17) | O(3)-Nd(2)-O(6)   | 108.7(5) |
| Nd(14)-O(75)      | 2.36(3)   | O(5)-Nd(2)-O(6)   | 64.7(5)  |
| Nd(14)-O(45)      | 2.362(15) | O(58)-Nd(2)-O(6)  | 71.6(5)  |
| Nd(14)-O(56)      | 2.377(16) | O(8)-Nd(2)-O(64)  | 96.8(6)  |
| Nd(14)-O(54)      | 2.389(17) | O(2)-Nd(2)-O(64)  | 71.8(6)  |
| Nd(14)-O(53)      | 2.450(17) | O(57)-Nd(2)-O(64) | 77.1(6)  |
| Nd(14)-O(49)      | 2.48(2)   | O(3)-Nd(2)-O(64)  | 75.1(6)  |
| Nd(14)-O(55)      | 2.510(19) | O(5)-Nd(2)-O(64)  | 142.6(6) |
| O(6)-Nd(1)-O(53)  | 104.8(5)  | O(58)-Nd(2)-O(64) | 132.5(6) |
| O(6)-Nd(1)-O(2)   | 71.9(5)   | O(6)-Nd(2)-O(64)  | 134.1(6) |
| O(53)-Nd(1)-O(2)  | 151.5(6)  | O(8)-Nd(2)-O(7)   | 67.4(6)  |
| O(6)-Nd(1)-O(74)  | 151.3(9)  | O(2)-Nd(2)-O(7)   | 135.8(6) |
| O(53)-Nd(1)-O(74) | 90.6(9)   | O(57)-Nd(2)-O(7)  | 84.9(6)  |
| O(2)-Nd(1)-O(74)  | 105.4(9)  | O(3)-Nd(2)-O(7)   | 117.4(5) |
| O(6)-Nd(1)-O(56)  | 87.3(5)   | O(5)-Nd(2)-O(7)   | 127.8(6) |
| O(53)-Nd(1)-O(56) | 69.6(5)   | O(58)-Nd(2)-O(7)  | 68.2(5)  |
| O(2)-Nd(1)-O(56)  | 136.7(6)  | O(6)-Nd(2)-O(7)   | 133.5(5) |
| O(74)-Nd(1)-O(56) | 75.4(9)   | O(64)-Nd(2)-O(7)  | 67.7(6)  |
| O(6)-Nd(1)-O(57)  | 69.9(5)   | O(3)-Nd(3)-O(11)  | 150.4(5) |
| O(53)-Nd(1)-O(57) | 137.2(6)  | O(3)-Nd(3)-O(5)   | 69.0(5)  |
| O(2)-Nd(1)-O(57)  | 69.5(6)   | O(11)-Nd(3)-O(5)  | 133.7(5) |
| O(74)-Nd(1)-O(57) | 82.2(9)   | O(3)-Nd(3)-O(9)   | 135.9(5) |
| O(56)-Nd(1)-O(57) | 67.8(5)   | O(11)-Nd(3)-O(9)  | 69.2(5)  |
| O(6)-Nd(1)-O(1)   | 130.8(6)  | O(5)-Nd(3)-O(9)   | 93.9(5)  |
| O(53)-Nd(1)-O(1)  | 94.0(7)   | O(3)-Nd(3)-O(8)   | 68.6(6)  |
| O(2)-Nd(1)-O(1)   | 70.4(7)   | O(11)-Nd(3)-O(8)  | 132.9(5) |
| O(74)-Nd(1)-O(1)  | 70.4(10)  | O(5)-Nd(3)-O(8)   | 67.0(5)  |
| O(56)-Nd(1)-O(1)  | 141.8(7)  | O(9)-Nd(3)-O(8)   | 67.3(5)  |
| O(57)-Nd(1)-O(1)  | 122.3(6)  | O(3)-Nd(3)-O(10)  | 81.6(6)  |
| O(6)-Nd(1)-O(52)  | 73.2(5)   | O(11)-Nd(3)-O(10) | 69.0(6)  |
| O(53)-Nd(1)-O(52) | 71.6(6)   | O(5)-Nd(3)-O(10)  | 139.3(6) |
| O(2)-Nd(1)-O(52)  | 80.6(6)   | O(9)-Nd(3)-O(10)  | 126.6(6) |
| O(74)-Nd(1)-O(52) | 135.4(9)  | O(8)-Nd(3)-O(10)  | 127.5(6) |
| O(56)-Nd(1)-O(52) | 129.8(6)  | O(3)-Nd(3)-O(65)  | 92.1(6)  |
| O(57)-Nd(1)-O(52) | 138.0(6)  | O(11)-Nd(3)-O(65) | 79.0(6)  |
| O(1)-Nd(1)-O(52)  | 70.5(7)   | O(5)-Nd(3)-O(65)  | 139.7(6) |
| O(8)-Nd(2)-O(2)   | 135.5(5)  | O(9)-Nd(3)-O(65)  | 74.8(6)  |
| O(8)-Nd(2)-O(57)  | 151.7(6)  | O(8)-Nd(3)-O(65)  | 73.0(6)  |
| O(2)-Nd(2)-O(57)  | 69.4(6)   | O(10)-Nd(3)-O(65) | 65.8(7)  |
| O(8)-Nd(2)-O(3)   | 69.3(5)   | O(3)-Nd(3)-O(66)  | 82.8(6)  |
| O(2)-Nd(2)-O(3)   | 66.2(6)   | O(11)-Nd(3)-O(66) | 86.0(6)  |

|                   |          |                   |          |
|-------------------|----------|-------------------|----------|
| O(5)-Nd(3)-O(66)  | 75.0(6)  | O(59)-Nd(5)-O(20) | 138.6(5) |
| O(9)-Nd(3)-O(66)  | 133.4(6) | O(21)-Nd(5)-O(20) | 65.7(5)  |
| O(8)-Nd(3)-O(66)  | 138.4(6) | O(14)-Nd(5)-O(67) | 81.1(6)  |
| O(10)-Nd(3)-O(66) | 73.9(6)  | O(80)-Nd(5)-O(67) | 89.1(6)  |
| O(65)-Nd(3)-O(66) | 139.7(6) | O(17)-Nd(5)-O(67) | 137.8(6) |
| O(3)-Nd(3)-O(4)   | 132.5(5) | O(59)-Nd(5)-O(67) | 137.6(7) |
| O(11)-Nd(3)-O(4)  | 66.9(5)  | O(21)-Nd(5)-O(67) | 75.5(6)  |
| O(5)-Nd(3)-O(4)   | 66.9(5)  | O(20)-Nd(5)-O(67) | 72.2(6)  |
| O(9)-Nd(3)-O(4)   | 64.4(5)  | O(14)-Nd(5)-O(13) | 68.7(6)  |
| O(8)-Nd(3)-O(4)   | 108.1(5) | O(80)-Nd(5)-O(13) | 82.2(6)  |
| O(10)-Nd(3)-O(4)  | 123.7(6) | O(17)-Nd(5)-O(13) | 137.0(6) |
| O(65)-Nd(3)-O(4)  | 133.6(6) | O(59)-Nd(5)-O(13) | 68.3(7)  |
| O(66)-Nd(3)-O(4)  | 69.7(6)  | O(21)-Nd(5)-O(13) | 129.2(6) |
| O(15)-Nd(4)-O(12) | 85.6(6)  | O(20)-Nd(5)-O(13) | 131.0(6) |
| O(15)-Nd(4)-O(9)  | 81.6(6)  | O(67)-Nd(5)-O(13) | 69.5(7)  |
| O(12)-Nd(4)-O(9)  | 132.9(6) | O(14)-Nd(5)-O(16) | 66.5(5)  |
| O(15)-Nd(4)-O(21) | 134.1(6) | O(80)-Nd(5)-O(16) | 133.4(5) |
| O(12)-Nd(4)-O(21) | 80.0(6)  | O(17)-Nd(5)-O(16) | 67.6(5)  |
| O(9)-Nd(4)-O(21)  | 137.7(5) | O(59)-Nd(5)-O(16) | 71.5(5)  |
| O(15)-Nd(4)-O(11) | 97.8(6)  | O(21)-Nd(5)-O(16) | 65.8(5)  |
| O(12)-Nd(4)-O(11) | 66.6(6)  | O(20)-Nd(5)-O(16) | 108.3(5) |
| O(9)-Nd(4)-O(11)  | 70.5(5)  | O(67)-Nd(5)-O(16) | 135.7(6) |
| O(21)-Nd(4)-O(11) | 115.3(5) | O(13)-Nd(5)-O(16) | 120.3(6) |
| O(15)-Nd(4)-O(14) | 66.7(6)  | O(20)-Nd(6)-O(79) | 134.6(6) |
| O(12)-Nd(4)-O(14) | 93.2(6)  | O(20)-Nd(6)-O(27) | 153.5(5) |
| O(9)-Nd(4)-O(14)  | 121.9(6) | O(79)-Nd(6)-O(27) | 68.9(6)  |
| O(21)-Nd(4)-O(14) | 70.9(5)  | O(20)-Nd(6)-O(17) | 67.2(5)  |
| O(11)-Nd(4)-O(14) | 156.1(5) | O(79)-Nd(6)-O(17) | 94.9(5)  |
| O(15)-Nd(4)-O(4)  | 147.3(6) | O(27)-Nd(6)-O(17) | 131.0(5) |
| O(12)-Nd(4)-O(4)  | 112.1(6) | O(20)-Nd(6)-O(80) | 67.5(5)  |
| O(9)-Nd(4)-O(4)   | 66.1(5)  | O(79)-Nd(6)-O(80) | 67.0(5)  |
| O(21)-Nd(4)-O(4)  | 77.6(5)  | O(27)-Nd(6)-O(80) | 133.6(5) |
| O(11)-Nd(4)-O(4)  | 67.4(5)  | O(17)-Nd(6)-O(80) | 67.2(5)  |
| O(14)-Nd(4)-O(4)  | 135.1(5) | O(20)-Nd(6)-O(60) | 82.0(5)  |
| O(15)-Nd(4)-O(16) | 109.0(6) | O(79)-Nd(6)-O(60) | 138.7(5) |
| O(12)-Nd(4)-O(16) | 145.2(6) | O(27)-Nd(6)-O(60) | 82.4(5)  |
| O(9)-Nd(4)-O(16)  | 81.4(5)  | O(17)-Nd(6)-O(60) | 81.7(5)  |
| O(21)-Nd(4)-O(16) | 67.1(5)  | O(80)-Nd(6)-O(60) | 142.7(5) |
| O(11)-Nd(4)-O(16) | 137.6(5) | O(20)-Nd(6)-O(68) | 97.0(6)  |
| O(14)-Nd(4)-O(16) | 66.2(5)  | O(79)-Nd(6)-O(68) | 69.9(6)  |
| O(4)-Nd(4)-O(16)  | 72.5(5)  | O(27)-Nd(6)-O(68) | 79.0(6)  |
| O(14)-Nd(5)-O(80) | 150.9(6) | O(17)-Nd(6)-O(68) | 140.2(6) |
| O(14)-Nd(5)-O(17) | 134.0(5) | O(80)-Nd(6)-O(68) | 73.0(6)  |
| O(80)-Nd(5)-O(17) | 69.0(5)  | O(60)-Nd(6)-O(68) | 134.0(6) |
| O(14)-Nd(5)-O(59) | 86.2(6)  | O(20)-Nd(6)-O(19) | 68.0(5)  |
| O(80)-Nd(5)-O(59) | 82.8(5)  | O(79)-Nd(6)-O(19) | 134.1(5) |
| O(17)-Nd(5)-O(59) | 76.8(5)  | O(27)-Nd(6)-O(19) | 86.6(5)  |
| O(14)-Nd(5)-O(21) | 70.5(5)  | O(17)-Nd(6)-O(19) | 129.3(5) |
| O(80)-Nd(5)-O(21) | 133.3(5) | O(80)-Nd(6)-O(19) | 114.5(5) |
| O(17)-Nd(5)-O(21) | 93.4(5)  | O(60)-Nd(6)-O(19) | 69.7(5)  |
| O(59)-Nd(5)-O(21) | 136.7(5) | O(68)-Nd(6)-O(19) | 67.6(6)  |
| O(14)-Nd(5)-O(20) | 133.0(5) | O(20)-Nd(6)-O(18) | 128.6(5) |
| O(80)-Nd(5)-O(20) | 67.6(5)  | O(79)-Nd(6)-O(18) | 69.1(5)  |
| O(17)-Nd(5)-O(20) | 66.2(5)  | O(27)-Nd(6)-O(18) | 65.3(5)  |

|                   |          |                    |           |
|-------------------|----------|--------------------|-----------|
| O(17)-Nd(6)-O(18) | 65.7(5)  | O(36)-Nd(8)-O(77)  | 141.5(10) |
| O(80)-Nd(6)-O(18) | 110.3(5) | O(29)-Nd(8)-O(77)  | 94.5(9)   |
| O(60)-Nd(6)-O(18) | 72.1(5)  | O(26)-Nd(8)-O(77)  | 106.8(9)  |
| O(68)-Nd(6)-O(18) | 132.8(6) | O(23)-Nd(8)-O(77)  | 78.4(10)  |
| O(19)-Nd(6)-O(18) | 134.9(5) | O(24)-Nd(8)-O(77)  | 73.5(10)  |
| O(79)-Nd(7)-O(18) | 73.9(5)  | O(25)-Nd(8)-O(77)  | 139.2(10) |
| O(79)-Nd(7)-O(23) | 150.7(6) | O(28)-Nd(8)-O(77)  | 68.1(10)  |
| O(18)-Nd(7)-O(23) | 99.5(5)  | O(36)-Nd(8)-O(76)  | 154.6(7)  |
| O(79)-Nd(7)-O(27) | 70.6(6)  | O(29)-Nd(8)-O(76)  | 129.3(6)  |
| O(18)-Nd(7)-O(27) | 68.5(5)  | O(26)-Nd(8)-O(76)  | 66.4(6)   |
| O(23)-Nd(7)-O(27) | 134.5(6) | O(23)-Nd(8)-O(76)  | 68.6(7)   |
| O(79)-Nd(7)-O(26) | 137.6(5) | O(24)-Nd(8)-O(76)  | 105.3(7)  |
| O(18)-Nd(7)-O(26) | 86.8(5)  | O(25)-Nd(8)-O(76)  | 118.0(7)  |
| O(23)-Nd(7)-O(26) | 68.5(5)  | O(28)-Nd(8)-O(76)  | 70.8(7)   |
| O(27)-Nd(7)-O(26) | 67.2(5)  | O(77)-Nd(8)-O(76)  | 40.6(9)   |
| O(79)-Nd(7)-O(22) | 77.6(6)  | O(32)-Nd(9)-O(29)  | 135.0(6)  |
| O(18)-Nd(7)-O(22) | 74.9(5)  | O(32)-Nd(9)-O(24)  | 153.0(6)  |
| O(23)-Nd(7)-O(22) | 73.2(6)  | O(29)-Nd(9)-O(24)  | 68.8(6)   |
| O(27)-Nd(7)-O(22) | 136.6(5) | O(32)-Nd(9)-O(35)  | 67.8(5)   |
| O(26)-Nd(7)-O(22) | 133.8(6) | O(29)-Nd(9)-O(35)  | 94.8(5)   |
| O(79)-Nd(7)-O(78) | 69.1(6)  | O(24)-Nd(9)-O(35)  | 131.1(5)  |
| O(18)-Nd(7)-O(78) | 134.1(6) | O(32)-Nd(9)-O(61)  | 81.5(5)   |
| O(23)-Nd(7)-O(78) | 99.7(6)  | O(29)-Nd(9)-O(61)  | 139.2(5)  |
| O(27)-Nd(7)-O(78) | 120.4(6) | O(24)-Nd(9)-O(61)  | 82.6(5)   |
| O(26)-Nd(7)-O(78) | 139.0(6) | O(35)-Nd(9)-O(61)  | 82.3(5)   |
| O(22)-Nd(7)-O(78) | 71.5(6)  | O(32)-Nd(9)-O(30)  | 68.2(5)   |
| O(79)-Nd(7)-O(76) | 125.7(7) | O(29)-Nd(9)-O(30)  | 66.8(6)   |
| O(18)-Nd(7)-O(76) | 154.4(7) | O(24)-Nd(9)-O(30)  | 132.9(5)  |
| O(23)-Nd(7)-O(76) | 71.2(7)  | O(35)-Nd(9)-O(30)  | 68.0(5)   |
| O(27)-Nd(7)-O(76) | 100.5(7) | O(61)-Nd(9)-O(30)  | 143.6(5)  |
| O(26)-Nd(7)-O(76) | 67.6(7)  | O(32)-Nd(9)-O(69)  | 97.3(6)   |
| O(22)-Nd(7)-O(76) | 122.1(7) | O(29)-Nd(9)-O(69)  | 69.4(6)   |
| O(78)-Nd(7)-O(76) | 71.4(7)  | O(24)-Nd(9)-O(69)  | 78.3(6)   |
| O(36)-Nd(8)-O(29) | 73.0(5)  | O(35)-Nd(9)-O(69)  | 140.4(6)  |
| O(36)-Nd(8)-O(26) | 100.3(5) | O(61)-Nd(9)-O(69)  | 133.5(6)  |
| O(29)-Nd(8)-O(26) | 150.4(6) | O(30)-Nd(9)-O(69)  | 72.4(6)   |
| O(36)-Nd(8)-O(23) | 86.6(5)  | O(32)-Nd(9)-O(36)  | 129.1(5)  |
| O(29)-Nd(8)-O(23) | 137.1(5) | O(29)-Nd(9)-O(36)  | 69.0(5)   |
| O(26)-Nd(8)-O(23) | 69.1(5)  | O(24)-Nd(9)-O(36)  | 65.3(5)   |
| O(36)-Nd(8)-O(24) | 68.1(5)  | O(35)-Nd(9)-O(36)  | 65.8(5)   |
| O(29)-Nd(8)-O(24) | 70.1(6)  | O(61)-Nd(9)-O(36)  | 72.9(5)   |
| O(26)-Nd(8)-O(24) | 135.3(6) | O(30)-Nd(9)-O(36)  | 110.8(5)  |
| O(23)-Nd(8)-O(24) | 67.3(5)  | O(69)-Nd(9)-O(36)  | 132.1(6)  |
| O(36)-Nd(8)-O(25) | 74.8(6)  | O(32)-Nd(9)-O(31)  | 68.3(5)   |
| O(29)-Nd(8)-O(25) | 77.8(6)  | O(29)-Nd(9)-O(31)  | 133.6(5)  |
| O(26)-Nd(8)-O(25) | 72.6(6)  | O(24)-Nd(9)-O(31)  | 85.6(5)   |
| O(23)-Nd(8)-O(25) | 133.2(6) | O(35)-Nd(9)-O(31)  | 130.0(5)  |
| O(24)-Nd(8)-O(25) | 136.3(6) | O(61)-Nd(9)-O(31)  | 68.7(5)   |
| O(36)-Nd(8)-O(28) | 134.2(6) | O(30)-Nd(9)-O(31)  | 114.9(5)  |
| O(29)-Nd(8)-O(28) | 70.1(6)  | O(69)-Nd(9)-O(31)  | 67.9(6)   |
| O(26)-Nd(8)-O(28) | 98.5(6)  | O(36)-Nd(9)-O(31)  | 134.2(5)  |
| O(23)-Nd(8)-O(28) | 139.2(6) | O(30)-Nd(10)-O(63) | 83.4(6)   |
| O(24)-Nd(8)-O(28) | 120.9(6) | O(30)-Nd(10)-O(33) | 133.4(5)  |
| O(25)-Nd(8)-O(28) | 71.7(6)  | O(63)-Nd(10)-O(33) | 136.6(6)  |

|                    |          |                    |          |
|--------------------|----------|--------------------|----------|
| O(30)-Nd(10)-O(35) | 69.4(5)  | O(42)-Nd(11)-O(34) | 144.6(6) |
| O(63)-Nd(10)-O(35) | 76.8(6)  | O(39)-Nd(11)-O(34) | 109.2(6) |
| O(33)-Nd(10)-O(35) | 94.1(5)  | O(48)-Nd(11)-O(34) | 81.9(5)  |
| O(30)-Nd(10)-O(38) | 150.8(5) | O(33)-Nd(11)-O(34) | 67.2(5)  |
| O(63)-Nd(10)-O(38) | 87.1(6)  | O(38)-Nd(11)-O(34) | 67.2(5)  |
| O(33)-Nd(10)-O(38) | 69.4(5)  | O(41)-Nd(11)-O(34) | 137.9(5) |
| O(35)-Nd(10)-O(38) | 134.7(5) | O(43)-Nd(11)-O(34) | 73.4(5)  |
| O(30)-Nd(10)-O(32) | 67.4(5)  | O(41)-Nd(12)-O(48) | 69.7(5)  |
| O(63)-Nd(10)-O(32) | 138.4(6) | O(41)-Nd(12)-O(51) | 149.7(6) |
| O(33)-Nd(10)-O(32) | 66.1(5)  | O(48)-Nd(12)-O(51) | 135.8(6) |
| O(35)-Nd(10)-O(32) | 65.8(5)  | O(41)-Nd(12)-O(47) | 133.2(5) |
| O(38)-Nd(10)-O(32) | 132.2(6) | O(48)-Nd(12)-O(47) | 67.2(5)  |
| O(30)-Nd(10)-O(70) | 88.2(6)  | O(51)-Nd(12)-O(47) | 68.6(6)  |
| O(63)-Nd(10)-O(70) | 137.0(7) | O(41)-Nd(12)-O(44) | 134.2(5) |
| O(33)-Nd(10)-O(70) | 75.9(6)  | O(48)-Nd(12)-O(44) | 94.5(5)  |
| O(35)-Nd(10)-O(70) | 138.2(6) | O(51)-Nd(12)-O(44) | 69.0(5)  |
| O(38)-Nd(10)-O(70) | 80.1(7)  | O(47)-Nd(12)-O(44) | 67.2(5)  |
| O(32)-Nd(10)-O(70) | 73.2(6)  | O(41)-Nd(12)-O(40) | 67.6(6)  |
| O(30)-Nd(10)-O(37) | 81.5(6)  | O(48)-Nd(12)-O(40) | 125.6(6) |
| O(63)-Nd(10)-O(37) | 67.9(7)  | O(51)-Nd(12)-O(40) | 82.3(6)  |
| O(33)-Nd(10)-O(37) | 129.2(6) | O(47)-Nd(12)-O(40) | 128.0(6) |
| O(35)-Nd(10)-O(37) | 136.3(6) | O(44)-Nd(12)-O(40) | 139.7(6) |
| O(38)-Nd(10)-O(37) | 69.4(6)  | O(41)-Nd(12)-O(71) | 78.5(6)  |
| O(32)-Nd(10)-O(37) | 131.3(6) | O(48)-Nd(12)-O(71) | 74.1(6)  |
| O(70)-Nd(10)-O(37) | 69.2(7)  | O(51)-Nd(12)-O(71) | 92.4(6)  |
| O(30)-Nd(10)-O(34) | 133.7(5) | O(47)-Nd(12)-O(71) | 73.0(6)  |
| O(63)-Nd(10)-O(34) | 70.7(6)  | O(44)-Nd(12)-O(71) | 139.9(6) |
| O(33)-Nd(10)-O(34) | 66.6(5)  | O(40)-Nd(12)-O(71) | 65.9(6)  |
| O(35)-Nd(10)-O(34) | 67.8(5)  | O(41)-Nd(12)-O(72) | 86.1(6)  |
| O(38)-Nd(10)-O(34) | 66.9(5)  | O(48)-Nd(12)-O(72) | 133.3(6) |
| O(32)-Nd(10)-O(34) | 108.6(5) | O(51)-Nd(12)-O(72) | 82.9(6)  |
| O(70)-Nd(10)-O(34) | 136.5(6) | O(47)-Nd(12)-O(72) | 137.9(6) |
| O(37)-Nd(10)-O(34) | 119.9(6) | O(44)-Nd(12)-O(72) | 74.0(6)  |
| O(42)-Nd(11)-O(39) | 85.0(7)  | O(40)-Nd(12)-O(72) | 74.9(6)  |
| O(42)-Nd(11)-O(48) | 133.1(6) | O(71)-Nd(12)-O(72) | 140.7(6) |
| O(39)-Nd(11)-O(48) | 81.7(6)  | O(41)-Nd(12)-O(43) | 66.7(5)  |
| O(42)-Nd(11)-O(33) | 79.5(6)  | O(48)-Nd(12)-O(43) | 64.3(5)  |
| O(39)-Nd(11)-O(33) | 134.0(6) | O(51)-Nd(12)-O(43) | 133.4(5) |
| O(48)-Nd(11)-O(33) | 138.1(5) | O(47)-Nd(12)-O(43) | 108.3(5) |
| O(42)-Nd(11)-O(38) | 91.1(6)  | O(44)-Nd(12)-O(43) | 67.7(5)  |
| O(39)-Nd(11)-O(38) | 66.7(6)  | O(40)-Nd(12)-O(43) | 122.7(6) |
| O(48)-Nd(11)-O(38) | 123.3(6) | O(71)-Nd(12)-O(43) | 132.5(5) |
| O(33)-Nd(11)-O(38) | 70.6(5)  | O(72)-Nd(12)-O(43) | 69.6(5)  |
| O(42)-Nd(11)-O(41) | 67.4(6)  | O(47)-Nd(13)-O(54) | 153.6(6) |
| O(39)-Nd(11)-O(41) | 97.4(6)  | O(47)-Nd(13)-O(50) | 135.5(6) |
| O(48)-Nd(11)-O(41) | 70.0(5)  | O(54)-Nd(13)-O(50) | 68.1(6)  |
| O(33)-Nd(11)-O(41) | 115.4(5) | O(47)-Nd(13)-O(51) | 68.4(6)  |
| O(38)-Nd(11)-O(41) | 154.9(6) | O(54)-Nd(13)-O(51) | 132.5(6) |
| O(42)-Nd(11)-O(43) | 112.5(6) | O(50)-Nd(13)-O(51) | 67.1(6)  |
| O(39)-Nd(11)-O(43) | 146.7(6) | O(47)-Nd(13)-O(44) | 67.4(5)  |
| O(48)-Nd(11)-O(43) | 65.6(5)  | O(54)-Nd(13)-O(44) | 131.0(5) |
| O(33)-Nd(11)-O(43) | 78.5(5)  | O(50)-Nd(13)-O(44) | 94.3(6)  |
| O(38)-Nd(11)-O(43) | 136.8(5) | O(51)-Nd(13)-O(44) | 67.7(5)  |
| O(41)-Nd(11)-O(43) | 66.7(5)  | O(47)-Nd(13)-O(62) | 82.5(5)  |



|                    |           |                    |           |
|--------------------|-----------|--------------------|-----------|
| O(54)-Nd(13)-O(62) | 82.6(5)   | O(75)-Nd(14)-O(45) | 151.8(9)  |
| O(50)-Nd(13)-O(62) | 136.3(6)  | O(50)-Nd(14)-O(56) | 151.9(6)  |
| O(51)-Nd(13)-O(62) | 143.2(6)  | O(75)-Nd(14)-O(56) | 91.3(10)  |
| O(44)-Nd(13)-O(62) | 80.8(5)   | O(45)-Nd(14)-O(56) | 103.2(5)  |
| O(47)-Nd(13)-O(45) | 127.2(5)  | O(50)-Nd(14)-O(54) | 69.3(6)   |
| O(54)-Nd(13)-O(45) | 67.0(5)   | O(75)-Nd(14)-O(54) | 82.5(9)   |
| O(50)-Nd(13)-O(45) | 68.2(5)   | O(45)-Nd(14)-O(54) | 70.3(5)   |
| O(51)-Nd(13)-O(45) | 109.1(5)  | O(56)-Nd(14)-O(54) | 136.5(6)  |
| O(44)-Nd(13)-O(45) | 64.0(5)   | O(50)-Nd(14)-O(53) | 136.5(6)  |
| O(62)-Nd(13)-O(45) | 70.8(5)   | O(75)-Nd(14)-O(53) | 75.2(9)   |
| O(47)-Nd(13)-O(46) | 68.0(5)   | O(45)-Nd(14)-O(53) | 87.4(5)   |
| O(54)-Nd(13)-O(46) | 86.2(6)   | O(56)-Nd(14)-O(53) | 69.1(6)   |
| O(50)-Nd(13)-O(46) | 137.0(6)  | O(54)-Nd(14)-O(53) | 67.7(6)   |
| O(51)-Nd(13)-O(46) | 117.3(6)  | O(50)-Nd(14)-O(49) | 71.0(6)   |
| O(44)-Nd(13)-O(46) | 127.9(5)  | O(75)-Nd(14)-O(49) | 70.3(10)  |
| O(62)-Nd(13)-O(46) | 68.0(5)   | O(45)-Nd(14)-O(49) | 131.1(6)  |
| O(45)-Nd(13)-O(46) | 133.0(5)  | O(56)-Nd(14)-O(49) | 94.5(6)   |
| O(47)-Nd(13)-O(73) | 97.4(6)   | O(54)-Nd(14)-O(49) | 122.8(6)  |
| O(54)-Nd(13)-O(73) | 77.4(6)   | O(53)-Nd(14)-O(49) | 141.4(6)  |
| O(50)-Nd(13)-O(73) | 72.3(6)   | O(50)-Nd(14)-O(55) | 80.4(6)   |
| O(51)-Nd(13)-O(73) | 74.7(6)   | O(75)-Nd(14)-O(55) | 135.3(10) |
| O(44)-Nd(13)-O(73) | 142.3(6)  | O(45)-Nd(14)-O(55) | 72.8(6)   |
| O(62)-Nd(13)-O(73) | 133.2(6)  | O(56)-Nd(14)-O(55) | 72.0(6)   |
| O(45)-Nd(13)-O(73) | 134.1(6)  | O(54)-Nd(14)-O(55) | 137.7(6)  |
| O(46)-Nd(13)-O(73) | 68.8(6)   | O(53)-Nd(14)-O(55) | 130.4(6)  |
| O(50)-Nd(14)-O(75) | 105.3(10) | O(49)-Nd(14)-O(55) | 70.1(7)   |
| O(50)-Nd(14)-O(45) | 72.4(5)   |                    |           |

---
